# Supplementary material
Source: PubMed Central journal article supplement (PMC8377573)
Supplement: jamaoncol-e211499-s001.pdf [file jamaoncol-e211499-s001.pdf]

## Supplementary Online Content

Bandera EV, Qin B, Lin Y, et al. Association of body mass index, central obesity, and body composition with mortality among Black breast cancer survivors. *JAMA Oncol*. Published online June 4, 2021. doi:10.1001/jamaoncol.2021.1499

**eTable 1.** Selected Participant Characteristics by Baseline BMI

**eTable 2.** Clinical Characteristics by Baseline BMI

**eTable 3.** Associations of Body Size, Body Fat Distribution, and Body Composition With Breast Cancer–Specific Mortality by Estrogen Receptor Status Among Black Breast Cancer Survivors

**eTable 4.** Precision Analyses: Estimated Half-width of 95% CIs for Main Results

This supplementary material has been provided by the authors to give readers additional information about their work.

**eTable 1.** Selected Participant Characteristics by Baseline BMI

|                                          | Overall Cohort<br>n (%) | Baseline BMI (kg/m <sup>2</sup> ) <sup>a</sup> |                      |                      |                      |                 | p value <sup>b</sup> |
|------------------------------------------|-------------------------|------------------------------------------------|----------------------|----------------------|----------------------|-----------------|----------------------|
|                                          |                         | 18.5-24.99<br>301 (16)                         | 25-29.99<br>528 (28) | 30-34.99<br>503 (26) | 35-39.99<br>322 (17) | ≥40<br>237 (13) |                      |
| <b>Age at diagnosis, y</b>               |                         |                                                |                      |                      |                      |                 |                      |
| 21-40                                    | 189 (10)                | 43 (14)                                        | 48 (9)               | 56 (11)              | 22 (7)               | 20 (8)          | .008                 |
| 41-60                                    | 1105 (58)               | 184 (61)                                       | 320 (61)             | 279 (56)             | 176 (55)             | 146 (62)        |                      |
| 61-75                                    | 597 (32)                | 74 (25)                                        | 160 (30)             | 168 (33)             | 124 (38)             | 71 (30)         |                      |
| Mean±SD                                  | 54.46±10.75             | 52.18±11.23                                    | 54.46±10.63          | 54.64±10.95          | 56.02±10.36          | 54.89±10.05     |                      |
| <b>Birthplace</b>                        |                         |                                                |                      |                      |                      |                 |                      |
| United States                            | 1580 (84)               | 229 (76)                                       | 431 (82)             | 420 (84)             | 280 (87)             | 220 (93)        | <.001                |
| Non US born                              | 311 (16)                | 72 (24)                                        | 97 (18)              | 83 (16)              | 42 (13)              | 17 (7)          |                      |
| <b>Education</b>                         |                         |                                                |                      |                      |                      |                 |                      |
| ≤High school graduate                    | 728 (39)                | 103 (34)                                       | 185 (36)             | 199 (40)             | 133 (41)             | 108 (46)        | <.001                |
| Some college                             | 589 (31)                | 79 (26)                                        | 171 (32)             | 167 (33)             | 101 (32)             | 71 (30)         |                      |
| ≥College                                 | 572 (30)                | 119 (40)                                       | 171 (32)             | 136 (27)             | 88 (27)              | 58 (24)         |                      |
| <b>Marital status</b>                    |                         |                                                |                      |                      |                      |                 |                      |
| Married/living as married                | 702 (37)                | 115 (38)                                       | 204 (39)             | 201 (40)             | 111 (34)             | 71 (30)         | .009                 |
| Widow                                    | 187 (10)                | 22 (7)                                         | 45 (8)               | 45 (9)               | 44 (14)              | 31 (13)         |                      |
| Divorced/separated                       | 457 (24)                | 71 (24)                                        | 130 (25)             | 119 (24)             | 81 (25)              | 56 (24)         |                      |
| Single/never married                     | 542 (29)                | 92 (31)                                        | 148 (28)             | 137 (27)             | 86 (27)              | 79 (33)         |                      |
| <b>Household income</b>                  |                         |                                                |                      |                      |                      |                 |                      |
| <\$25,000                                | 548 (29)                | 91 (30)                                        | 128 (24)             | 140 (28)             | 97 (30)              | 92 (39)         | <.001                |
| \$25,000-69,999                          | 656 (35)                | 100 (33)                                       | 178 (34)             | 182 (36)             | 110 (34)             | 86 (36)         |                      |
| ≥\$70,000                                | 554 (29)                | 95 (32)                                        | 188 (36)             | 137 (27)             | 90 (28)              | 44 (19)         |                      |
| Unknown                                  | 133 (7)                 | 15 (5)                                         | 34 (6)               | 44 (9)               | 25 (8)               | 15 (6)          |                      |
| <b>Insurance status</b>                  |                         |                                                |                      |                      |                      |                 |                      |
| Private                                  | 1056 (56)               | 166 (55)                                       | 313 (59)             | 277 (55)             | 173 (54)             | 127 (53)        | .008                 |
| Medicaid/ Medicare                       | 528 (28)                | 72 (24)                                        | 130 (25)             | 156 (31)             | 97 (30)              | 73 (31)         |                      |
| Uninsured                                | 197 (10)                | 42 (14)                                        | 45 (9)               | 43 (9)               | 37 (11)              | 30 (13)         |                      |
| Other/Unknown                            | 110 (6)                 | 21 (7)                                         | 40 (7)               | 27 (5)               | 15 (5)               | 7 (3)           |                      |
| <b>Menopausal status</b>                 |                         |                                                |                      |                      |                      |                 |                      |
| Pre-menopausal                           | 731 (39)                | 140 (47)                                       | 211 (40)             | 188 (37)             | 101 (31)             | 91 (38)         | .003                 |
| Post-menopausal                          | 1160 (61)               | 161 (53)                                       | 317 (60)             | 315 (63)             | 221 (69)             | 146 (62)        |                      |
| <b>Smoking status (before diagnosis)</b> |                         |                                                |                      |                      |                      |                 |                      |
| Never                                    | 1118 (59)               | 186 (62)                                       | 315 (60)             | 303 (60)             | 177 (55)             | 137 (58)        | <.001                |
| Former                                   | 464 (25)                | 47 (16)                                        | 125 (24)             | 129 (26)             | 95 (29)              | 68 (29)         |                      |
| Current                                  | 308 (16)                | 68 (22)                                        | 88 (16)              | 70 (14)              | 50 (16)              | 32 (13)         |                      |

|                                                                 |           |          |          |          |          |          |                 |
|-----------------------------------------------------------------|-----------|----------|----------|----------|----------|----------|-----------------|
| <b>Alcohol drinking (before diagnosis)</b>                      |           |          |          |          |          |          |                 |
| Non-drinker                                                     | 1041 (55) | 152 (50) | 279 (53) | 276 (55) | 184 (57) | 150 (63) | <i>.02</i>      |
| >0-≤1 drinks/d                                                  | 618 (33)  | 109 (36) | 187 (35) | 155 (31) | 101 (32) | 66 (28)  |                 |
| >1 drink/day                                                    | 69 (4)    | 11 (4)   | 21 (4)   | 23 (4)   | 7 (2)    | 7 (3)    |                 |
| Unknown                                                         | 163 (8)   | 29 (10)  | 41 (8)   | 49 (10)  | 30 (9)   | 14 (6)   |                 |
| <b>Physical activity (before diagnosis, in METS-hours/week)</b> |           |          |          |          |          |          |                 |
| T1 (<11.7)                                                      | 627 (33)  | 97 (32)  | 167 (32) | 169 (34) | 100 (31) | 94 (40)  | <i>.33</i>      |
| T2 (11.8-37.9)                                                  | 632 (34)  | 113 (38) | 169 (32) | 162 (32) | 107 (33) | 81 (34)  |                 |
| T3 (≥38)                                                        | 629 (33)  | 91 (30)  | 190 (36) | 172 (34) | 114 (36) | 62 (26)  |                 |
| <b>History of diabetes</b>                                      |           |          |          |          |          |          |                 |
| No                                                              | 1263 (67) | 237 (79) | 372 (70) | 318 (63) | 198 (61) | 138 (58) | <i>&lt;.001</i> |
| Yes                                                             | 424 (22)  | 22 (7)   | 105 (20) | 125 (25) | 100 (31) | 72 (30)  |                 |
| Unknown                                                         | 204 (11)  | 42 (14)  | 51 (10)  | 60 (12)  | 24 (8)   | 27 (12)  |                 |
| <b>History of hypertension</b>                                  |           |          |          |          |          |          |                 |
| No                                                              | 536 (28)  | 132 (44) | 178 (34) | 125 (25) | 65 (20)  | 36 (15)  | <i>&lt;.001</i> |
| Yes                                                             | 1151 (61) | 127 (42) | 299 (57) | 318 (63) | 233 (72) | 174 (73) |                 |
| Unknown                                                         | 204 (11)  | 42 (14)  | 51 (10)  | 60 (12)  | 24 (7)   | 27 (11)  |                 |
| <b>Percent body fat (%)</b>                                     |           |          |          |          |          |          |                 |
| ≤35%                                                            | 316 (17)  | 215 (71) | 76 (14)  | 17 (3)   | 5 (2)    | 3 (1)    | <i>&lt;.001</i> |
| >35%                                                            | 1451 (77) | 66 (22)  | 427 (81) | 453 (90) | 288 (89) | 217 (92) |                 |
| Missing                                                         | 124 (6)   | 20 (7)   | 25 (5)   | 33 (7)   | 29 (9)   | 17 (7)   |                 |
| <b>Fat mass index (kg/m<sup>2</sup>)</b>                        |           |          |          |          |          |          |                 |
| <9.5                                                            | 365 (19)  | 272 (91) | 88 (17)  | 3 (1)    | 2 (1)    | 0 (0)    | <i>&lt;.001</i> |
| ≥9.5                                                            | 1401 (74) | 10 (3)   | 414 (78) | 467 (93) | 290 (90) | 220 (93) |                 |
| Missing                                                         | 125 (7)   | 19 (6)   | 26 (5)   | 33 (6)   | 30 (9)   | 17 (7)   |                 |
| <b>Waist circumference (cm)</b>                                 |           |          |          |          |          |          |                 |
| ≤88 cm                                                          | 358 (19)  | 239 (79) | 110 (21) | 8 (2)    | 0 (0)    | 1 (1)    | <i>&lt;.001</i> |
| >88 cm                                                          | 1501 (79) | 56 (19)  | 408 (77) | 490 (97) | 317 (98) | 230 (97) |                 |
| Missing                                                         | 32 (2)    | 6 (2)    | 10 (2)   | 5 (1)    | 5 (2)    | 6 (2)    |                 |
| <b>Waist-to-hip ratio</b>                                       |           |          |          |          |          |          |                 |
| ≤0.85                                                           | 568 (30)  | 159 (53) | 184 (35) | 117 (23) | 68 (21)  | 40 (17)  | <i>&lt;.001</i> |
| >0.85                                                           | 1291 (68) | 136 (45) | 334 (63) | 381 (76) | 249 (77) | 191 (81) |                 |
| Missing                                                         | 32 (2)    | 6 (2)    | 10 (2)   | 5 (1)    | 5 (2)    | 6 (2)    |                 |

<sup>a</sup> Underweight women (BMI <18.5) were excluded (n=9)

<sup>b</sup> Based on Cochran-Mantel-Haenszel test (missing excluded)

**eTable 2.** Clinical Characteristics by Baseline BMI

|                                            | Overall Cohort<br>n (%) | Baseline BMI (kg/m <sup>2</sup> ) <sup>a</sup><br>n (%) |                      |                      |                      |                 | p value <sup>b</sup> |
|--------------------------------------------|-------------------------|---------------------------------------------------------|----------------------|----------------------|----------------------|-----------------|----------------------|
|                                            |                         | 18.5-24.99<br>301 (16)                                  | 25-29.99<br>528 (28) | 30-34.99<br>503 (26) | 35-39.99<br>322 (17) | ≥40<br>237 (13) |                      |
| <b>Stage</b>                               |                         |                                                         |                      |                      |                      |                 |                      |
| 0                                          | 340 (18)                | 54 (18)                                                 | 101 (19)             | 90 (18)              | 56 (17)              | 39 (16)         | .13                  |
| I                                          | 678 (36)                | 106 (35)                                                | 209 (40)             | 177 (35)             | 111 (34)             | 75 (32)         |                      |
| II                                         | 599 (32)                | 96 (32)                                                 | 146 (28)             | 164 (33)             | 105 (33)             | 88 (37)         |                      |
| III                                        | 196 (10)                | 34 (11)                                                 | 44 (8)               | 51 (10)              | 39 (12)              | 28 (12)         |                      |
| IV                                         | 46 (2)                  | 8 (3)                                                   | 18 (3)               | 10 (2)               | 6 (2)                | 4 (2)           |                      |
| Missing                                    | 32 (2)                  | 3 (1)                                                   | 10 (2)               | 11 (2)               | 5 (2)                | 3 (1)           |                      |
| <b>Grade</b>                               |                         |                                                         |                      |                      |                      |                 |                      |
| I-Well differentiated                      | 219 (12)                | 16 (5)                                                  | 78 (15)              | 59 (12)              | 40 (12)              | 26 (11)         | .44                  |
| II-Moderately differentiated               | 724 (38)                | 123 (41)                                                | 198 (38)             | 193 (38)             | 122 (38)             | 88 (37)         |                      |
| III-Poorly differentiated/undifferentiated | 811 (43)                | 139 (46)                                                | 213 (40)             | 213 (42)             | 137 (43)             | 109 (46)        |                      |
| Missing                                    | 137 (7)                 | 23 (8)                                                  | 39 (7)               | 38 (8)               | 23 (7)               | 14 (6)          |                      |
| <b>ER status</b>                           |                         |                                                         |                      |                      |                      |                 |                      |
| ER Positive                                | 1333 (70)               | 200 (66)                                                | 372 (71)             | 348 (69)             | 232 (72)             | 181 (76)        | .03                  |
| ER Negative                                | 506 (27)                | 93 (31)                                                 | 140 (26)             | 136 (27)             | 83 (26)              | 54 (23)         |                      |
| Missing                                    | 52 (3)                  | 8 (3)                                                   | 16 (3)               | 19 (4)               | 7 (2)                | 2 (1)           |                      |
| <b>Tumor subtype</b>                       |                         |                                                         |                      |                      |                      |                 |                      |
| Luminal A                                  | 909 (48)                | 131 (43)                                                | 234 (44)             | 256 (51)             | 150 (46)             | 138 (58)        | <.001                |
| HER2 Positive                              | 322 (17)                | 65 (22)                                                 | 103 (20)             | 72 (14)              | 54 (17)              | 28 (12)         |                      |
| Triple Negative                            | 328 (17)                | 53 (18)                                                 | 92 (17)              | 84 (17)              | 58 (18)              | 41 (17)         |                      |
| Missing                                    | 332 (18)                | 52 (17)                                                 | 99 (19)              | 91 (18)              | 60 (19)              | 30 (13)         |                      |
| <b>TREATMENT INFORMATION</b>               |                         |                                                         |                      |                      |                      |                 |                      |
| <b>Type of surgery</b>                     |                         |                                                         |                      |                      |                      |                 |                      |
| No surgery                                 | 63 (3)                  | 13 (4)                                                  | 19 (3)               | 15 (3)               | 12 (4)               | 4 (2)           | .07                  |
| Lumpectomy                                 | 963 (51)                | 132 (44)                                                | 273 (52)             | 263 (52)             | 168 (52)             | 127 (53)        |                      |
| Mastectomy                                 | 864 (46)                | 156 (52)                                                | 236 (45)             | 224 (45)             | 142 (44)             | 106 (45)        |                      |
| <b>Chemotherapy</b>                        |                         |                                                         |                      |                      |                      |                 |                      |
| Yes                                        | 1028 (55)               | 175 (58)                                                | 279 (53)             | 267 (53)             | 173 (54)             | 134 (57)        | .84                  |
| No                                         | 858 (45)                | 125 (42)                                                | 248 (47)             | 235 (47)             | 149 (46)             | 101 (43)        |                      |
| <b>Radiation therapy</b>                   |                         |                                                         |                      |                      |                      |                 |                      |
| Yes                                        | 1276 (68)               | 194 (65)                                                | 365 (69)             | 328 (65)             | 223 (69)             | 166 (70)        | .33                  |
| No                                         | 610 (32)                | 105 (35)                                                | 162 (31)             | 173 (35)             | 99 (31)              | 71 (30)         |                      |
| <b>Endocrine therapy</b>                   |                         |                                                         |                      |                      |                      |                 |                      |
| Yes                                        | 1204 (64)               | 175 (59)                                                | 356 (68)             | 314 (63)             | 210 (65)             | 149 (63)        | .69                  |
| No                                         | 679 (36)                | 122 (41)                                                | 170 (32)             | 188 (37)             | 112 (35)             | 87 (37)         |                      |

<sup>a</sup> Underweight women (BMI <18.5) were excluded (n=9)

<sup>b</sup> Based on Cochran-Mantel-Haenszel test (missing excluded)

**eTable 3.** Associations of Body Size, Body Fat Distribution, and Body Composition With Breast Cancer–Specific Mortality by Estrogen Receptor Status Among Black Breast Cancer Survivors

|                                          | ER Positive |                             |                          | ER Negative |                             |                  | <i>p</i> for interaction |
|------------------------------------------|-------------|-----------------------------|--------------------------|-------------|-----------------------------|------------------|--------------------------|
|                                          | n (%)       | Deaths due to breast cancer | HR <sup>a</sup> (95% CI) | n (%)       | Deaths due to breast cancer | HR (95% CI)      |                          |
| <b>Baseline BMI (kg/m<sup>2</sup>)</b>   |             |                             |                          |             |                             |                  |                          |
| Normal (18.5-24.9)                       | 200 (15)    | 16                          | Ref                      | 93 (18)     | 12                          | Ref              | .54                      |
| Overweight (25.0-29.9)                   | 372 (28)    | 21                          | 0.83 (0.41-1.66)         | 140 (28)    | 18                          | 0.97 (0.44-2.10) |                          |
| Obese I (30.0-34.9)                      | 347 (26)    | 28                          | 1.23 (0.66-2.27)         | 136 (27)    | 18                          | 1.09 (0.51-2.31) |                          |
| Obese II/III (≥35.0)                     | 413 (31)    | 31                          | 1.12 (0.60-2.08)         | 137 (27)    | 28                          | 1.51 (0.73-3.09) |                          |
| <i>p</i> for trend                       |             |                             | 0.12                     |             |                             | 0.11             |                          |
| Per 5 units                              | 1332        | 96                          | 1.08 (0.89-1.32)         | 506         | 76                          | 1.17 (0.93-1.47) | .54                      |
| <b>Waist circumference (cm)</b>          |             |                             |                          |             |                             |                  |                          |
| Q1 (<90.6)                               | 309 (24)    | 23                          | Ref                      | 139 (28)    | 16                          | Ref              | .34                      |
| Q2 (90.6-100.1)                          | 328 (25)    | 11                          | 0.47 (0.22-1.04)         | 116 (23)    | 15                          | 0.99 (0.48-2.05) |                          |
| Q3 (100.2-110.9)                         | 334 (25)    | 25                          | 1.15 (0.62-2.13)         | 123 (25)    | 15                          | 0.88 (0.41-1.88) |                          |
| Q4 (>110.9)                              | 343 (26)    | 32                          | 1.42 (0.78-2.60)         | 117 (24)    | 28                          | 1.65 (0.85-3.21) |                          |
| <i>p</i> for trend                       |             |                             | 0.18                     |             |                             | 0.20             |                          |
| Per 10 cm                                | 1314        | 91                          | 1.21 (0.97-1.50)         | 495         | 74                          | 1.18 (0.94-1.49) | .83                      |
| <b>Waist-to-hip ratio</b>                |             |                             |                          |             |                             |                  |                          |
| Q1 (0.65-0.84)                           | 331 (25)    | 17                          | Ref                      | 120 (24)    | 11                          | Ref              | .35                      |
| Q2 (0.85-0.89)                           | 319 (24)    | 18                          | 1.02 (0.50-2.10)         | 130 (26)    | 21                          | 1.53 (0.73-3.23) |                          |
| Q3 (0.90-0.95)                           | 330 (25)    | 26                          | 1.55 (0.77-3.15)         | 126 (26)    | 19                          | 1.16 (0.52-2.58) |                          |
| Q4 (>0.95)                               | 334 (26)    | 30                          | 1.53 (0.78-2.99)         | 119 (24)    | 23                          | 1.62 (0.77-3.41) |                          |
| <i>p</i> for trend                       |             |                             | <b>0.03</b>              |             |                             | <b>0.02</b>      |                          |
| Per 0.1 unit                             | 1314        | 91                          | 1.18 (0.96-1.45)         | 495         | 74                          | 1.12 (0.89-1.41) | .64                      |
| <b>Percent body fat (%)</b>              |             |                             |                          |             |                             |                  |                          |
| Q1 (<37.1)                               | 293 (23)    | 21                          | Ref                      | 132 (28)    | 14                          | Ref              | .64                      |
| Q2 (37.1-41.9)                           | 311 (25)    | 21                          | 1.31 (0.67-2.54)         | 114 (24)    | 17                          | 1.18 (0.56-2.52) |                          |
| Q3 (42.0-46.5)                           | 322 (26)    | 18                          | 1.12 (0.57-2.21)         | 115 (24)    | 15                          | 1.11 (0.48-2.54) |                          |
| Q4 (>46.5)                               | 321 (26)    | 28                          | 1.70 (0.95-3.06)         | 116 (24)    | 23                          | 2.04 (1.03-4.05) |                          |
| <i>p</i> for trend                       |             |                             | 0.16                     |             |                             | 0.16             |                          |
| Per 5 units                              | 1247        | 88                          | 1.16 (0.96-1.41)         | 477         | 69                          | 1.25 (0.99-1.57) | .66                      |
| <b>Fat Mass Index (kg/m<sup>2</sup>)</b> |             |                             |                          |             |                             |                  |                          |
| Q1 (<9.9)                                | 294 (24)    | 20                          | Ref                      | 129 (27)    | 13                          | Ref              | .48                      |
| Q2 (9.9-12.8)                            | 314 (25)    | 22                          | 1.34 (0.69-2.62)         | 119 (25)    | 19                          | 1.13 (0.52-2.47) |                          |
| Q3 (12.9-16.5)                           | 316 (25)    | 19                          | 1.20 (0.62-2.32)         | 113 (24)    | 16                          | 1.47 (0.67-3.22) |                          |
| Q4 (>16.5)                               | 323 (26)    | 28                          | 1.70 (0.91-3.20)         | 115 (24)    | 21                          | 1.66 (0.80-3.45) |                          |
| <i>p</i> for trend                       |             |                             | <b>0.03</b>              |             |                             | <b>0.04</b>      |                          |
| Per 5 units                              | 1247        | 89                          | 1.17 (0.96-1.42)         | 476         | 69                          | 1.20 (0.96-1.50) | .59                      |

<sup>a</sup>Hazard ratios (HR) and 95% confidence intervals (CI) from Fine and Gray's subdistribution hazard model adjusted for age, income, smoking, tumor stage, and type of surgery.

**eTable 4.** Precision Analyses: Estimated Half-width of 95% CIs for Main Results

|                                     | All-cause mortality      |                      | Breast cancer-specific mortality |                      |
|-------------------------------------|--------------------------|----------------------|----------------------------------|----------------------|
|                                     | HR <sup>a</sup> (95% CI) | half-width of 95% CI | HR <sup>a</sup> (95% CI)         | half-width of 95% CI |
| Baseline BMI (kg/m <sup>2</sup> )   |                          |                      |                                  |                      |
| Normal (18.5-24.9)                  | Ref                      | Ref                  | Ref                              | Ref                  |
| Overweight (25.0-29.9)              | 0.94 (0.64-1.37)         | 0.365                | 0.93 (0.57-1.53)                 | 0.480                |
| Obese I (30.0-34.9)                 | 1.17 (0.80-1.67)         | 0.435                | 1.27 (0.80-2.03)                 | 0.615                |
| Obese II/III (≥35.0)                | 1.26 (0.89-1.79)         | 0.450                | 1.33 (0.84-2.10)                 | 0.630                |
| Per 5 units                         | 1.11 (1.02-1.20)         | 0.090                | 1.11 (1.00-1.23)                 | 0.115                |
| Waist-to-hip ratio                  |                          |                      |                                  |                      |
| Q1 (0.65-0.84)                      | Ref                      | Ref                  | Ref                              | Ref                  |
| Q2 (0.85-0.89)                      | 1.07 (0.73-1.58)         | 0.425                | 1.25 (0.75-2.07)                 | 0.660                |
| Q3 (0.90-0.95)                      | 1.37 (0.94-2.00)         | 0.530                | 1.47 (0.88-2.46)                 | 0.790                |
| Q4 (>0.95)                          | 1.61 (1.12-2.33)         | 0.605                | 1.68 (1.04-2.71)                 | 0.835                |
| Per 0.1 unit                        | 1.29 (1.11-1.50)         | 0.195                | 1.19 (0.99-1.44)                 | 0.225                |
| Percent body fat (%)                |                          |                      |                                  |                      |
| Q1 (<37.1)                          | Ref                      | Ref                  | Ref                              | Ref                  |
| Q2 (37.1-41.9)                      | 1.14 (0.79-1.65)         | 0.430                | 1.29 (0.80-2.08)                 | 0.640                |
| Q3 (42.0-46.5)                      | 1.08 (0.75-1.56)         | 0.405                | 1.12 (0.68-1.85)                 | 0.585                |
| Q4 (>46.5)                          | 1.53 (1.09-2.15)         | 0.530                | 1.81 (1.17-2.80)                 | 0.815                |
| Per 5 units                         | 1.10 (1.01-1.20)         | 0.095                | 1.13 (1.00-1.28)                 | 0.140                |
| Fat mass index (kg/m <sup>2</sup> ) |                          |                      |                                  |                      |
| Q1 (<9.9)                           | Ref                      | Ref                  | Ref                              | Ref                  |
| Q2 (9.9-12.8)                       | 1.22 (0.85-1.75)         | 0.450                | 1.27 (0.79-2.03)                 | 0.620                |
| Q3 (12.9-16.5)                      | 1.22 (0.85-1.77)         | 0.460                | 1.28 (0.79-2.09)                 | 0.650                |
| Q4 (>16.5)                          | 1.57 (1.11-2.22)         | 0.555                | 1.74 (1.10-2.75)                 | 0.825                |
| Per 5 units                         | 1.18 (1.05-1.33)         | 0.140                | 1.20 (1.02-1.41)                 | 0.195                |

<sup>a</sup>The HRs and 95% CIs are presented in Table 1.
